# Supplementary material for: A network approach to identify bioregions in the distribution of Mediterranean amphipods associated with Posidonia oceanica meadows
Source: PeerJ. 2019 Apr 23;7:e6786. doi: 10.7717/peerj.6786 (PMC6485239; doi:10.7717/peerj.6786)
Supplement: Supplemental Information 2 [file peerj-07-6786-s002.xls]

## Sheet: Foglio1
	Tabarka	Bizerte	Rafraf	Zarzis Ogla	Zarzis plage Sonia	El Kantaoui	Monastir	Hergla	Mahdia	Gallipoli	Maruggio	Punta Prosciutto	Bari Palese	Punta Penne	San Domino	Calvi Bay	AMP Tavolara	Livorno	Lacco Ameno	Castello Aragonese	Porto Conte	Chiarone	Morelle	Giannutri	Lampedusa	Marettimo	Medes	Alicante
	TAB	BIZ	RAF	ZAO	ZAP	ELK	MON	HER	MAH	GAL	MAR	PPR	BPA	PPE	SDO	CBA	TAV	LIV	LAM	CAR	PCO	CHIA	MOR	GIAN	LAM	MART	MED	ALI	References
Abludomelita gladiosa (Spence Bate, 1862)	0	0	0	0	0	0	0	0	0	0	0	0	0	0	0	0	0	0	0	0	0	0	0	1	0	0	0	0	Bellisario et al., 2016
Acidostoma obesum (Spence Bate, 1862)	0	0	0	0	0	0	0	0	0	0	1	0	0	0	0	0	0	0	0	0	0	0	0	0	0	0	0	0	Diviacco et al., 1988
Ampelisca diadema (Costa, 1853)	0	0	0	0	0	0	0	0	0	1	0	1	1	1	0	0	1	1	0	0	0	1	0	0	0	0	0	0	Bedini et al., 2011; Bellisario et al., 2016; Diviacco et al., 1988; Sturaro et al., 2014
Ampelisca rubella A. Costa, 1864	1	1	1	0	0	1	1	1	1	0	0	0	0	0	0	1	1	0	0	1	0	0	0	1	0	0	0	0	Camisa et al., 2017; Scipione, 1998; Sturaro et al., 2014; Sturaro et al., 2015; Zakhama-Sraieb et al., 2006; Zakhama-Sraieb et al., 2011
Ampelisca serraticaudata Chevreux, 1888	0	0	0	0	0	0	0	0	0	0	0	0	0	0	0	0	0	0	0	0	0	0	1	0	0	0	0	0	Bellisario et al., 2016
Ampelisca spinipes Boeck, 1861	1	1	1	0	0	1	1	1	1	0	0	0	0	0	0	0	0	0	0	0	0	0	1	0	0	0	0	0	Bellisario et al., 2016; Zakhama-Sraieb et al., 2006; Zakhama-Sraieb et al., 2011
Ampelisca tenuicornis Liljeborg, 1855	0	0	0	0	0	0	0	0	0	0	0	0	0	0	0	0	0	0	0	0	0	1	0	1	0	0	0	0	Bellisario et al., 2016; Camisa et al., 2017
Ampelisca unidentata Schellenberg, 1936	1	1	1	1	1	1	1	1	1	0	0	0	0	0	0	0	0	0	0	0	0	0	1	0	0	0	0	0	Bellisario et al., 2016; Zakhama-Sraieb et al., 2006; Zakhama-Sraieb et al., 2011
Ampithoe ferox (Chevreux, 1901)	0	0	0	0	0	0	0	0	0	0	0	0	0	0	0	0	0	1	0	0	0	0	0	0	0	0	0	0	Bedini et al., 2011
Ampithoe ramondi Audouin, 1826	1	1	1	1	1	1	1	1	1	1	1	0	0	0	1	0	1	1	1	1	1	0	1	0	1	0	0	1	Bedini et al., 2011; Bellisario et al., 2016; Diviacco et al., 1988; Sánchez-Jerez et al., 2001; Scipione 1998; Sturaro et al., 2014; Zakhama-Sraieb et al., 2006; Zakhama-Sraieb et al., 2011
Animoceradocus semiserratus (Spence Bate, 1862)	0	0	0	0	0	0	0	0	0	0	0	0	0	0	0	0	0	0	0	0	0	0	0	1	0	0	0	1	Bellisario et al., 2016
Aora gracilis (Spence Bate, 1857)	0	0	0	0	0	1	1	1	1	0	0	0	0	0	0	1	1	1	0	0	0	0	0	0	0	0	0	0	Bedini et al., 2011; Sturaro et al., 2014; Sturaro et al., 2015; Zakhama-Sraieb et al., 2006
Aora spinicornis Afonso, 1976	0	0	0	0	0	0	0	1	0	1	0	1	1	0	1	1	1	1	1	1	1	1	1	1	1	1	1	1	Bedini et al., 2011; Bellisario et al., 2016; Diviacco et al., 1988; Sánchez-Jerez et al., 2001; Scipione 1998; Sturaro et al., 2014; Sturaro et al., 2015; Zakhama-Sraieb et al., 2011
Apherusa alacris Krapp-Schickel, 1969	0	0	0	0	0	0	0	0	0	0	0	0	0	0	0	0	0	1	0	0	0	0	0	0	0	0	0	0	Bedini et al., 2011
Apherusa bispinosa (Spence Bate, 1857)	0	0	0	0	0	0	0	0	0	0	0	0	0	0	0	0	0	1	0	0	0	0	0	0	0	0	0	0	Bedini et al., 2011
Apherusa chiereghinii Giordani-Soika, 1949	0	0	0	0	0	0	0	0	0	0	0	0	0	0	0	1	1	0	1	1	1	1	1	1	1	1	1	1	Bellisario et al., 2016; Camisa et al., 2017; Sánchez-Jerez et al., 2001; Scipione 1998; Sturaro et al., 2014; Sturaro et al., 2015
Apherusa vexatrix Krapp-Schickel, 1979	0	0	0	0	0	0	0	0	0	0	0	0	0	0	0	0	0	0	0	0	0	0	0	0	0	0	0	1	Sánchez-Jerez et al., 2001
Apocorophium acutum (Chevreux, 1908)	0	0	0	0	0	1	0	0	0	0	0	0	0	0	0	0	0	0	0	1	0	0	0	0	0	0	0	0	Scipione 1998; Zakhama-Sraieb et al., 2011
Apolochus brunneus (Della Valle, 1893)	0	0	0	0	0	0	0	0	0	0	0	0	0	0	0	0	0	0	0	0	0	1	1	0	0	0	0	0	Bellisario et al., 2016
Apolochus neapolitanus (Della Valle, 1893)	1	1	1	1	0	1	1	1	1	1	0	0	0	0	0	1	1	0	1	0	0	1	1	1	1	1	0	0	Bellisario et al., 2016; Camisa et al., 2017; Scipione 1998; Sturaro et al., 2014; Sturaro et al., 2015; Zakhama-Sraieb et al., 2006; Zakhama-Sraieb et al., 2011
Apolochus picadurus (J. L. Barnard, 1962)	0	0	0	0	0	0	0	0	0	1	0	0	0	0	0	0	0	0	1	0	0	1	1	1	0	0	0	0	Bellisario et al., 2016; Camisa et al., 2017; Scipione 1988; Scipione et al., 1996
Autonoe spiniventris Della Valle, 1893	0	0	0	0	0	0	0	0	0	1	1	0	0	0	0	0	0	0	0	0	0	1	0	0	0	0	0	0	Bellisario et al., 2016; Diviacco et al., 1988
Caprella acanthifera Leach, 1814	0	0	0	0	0	1	1	1	0	0	0	0	0	0	1	1	1	1	1	1	1	0	1	1	1	1	0	1	Bedini et al., 2011; Bellisario et al., 2016; Camisa et al., 2017; Diviacco et al., 1988; Sánchez-Jerez et al., 2001; Scipione 1998; Scipione et al., 1996; Sturaro et al., 2014; Sturaro et al., 2015; Zakhama-Sraieb et al., 2011
Caprella equilibra Say, 1818	0	0	0	0	0	0	0	0	0	0	0	0	0	0	0	0	0	1	0	0	0	0	0	0	0	0	0	0	Bedini et al., 2011
Caprella grandimana (Mayer, 1882)	0	0	1	0	0	0	0	1	0	0	0	0	0	0	0	0	0	0	0	0	0	1	0	0	0	0	0	0	Bellisario et al., 2016; Zakhama-Sraieb et al., 2011
Caprella liparotensis Haller, 1879	0	0	0	0	0	0	0	1	0	0	0	0	0	0	0	0	0	0	1	0	0	0	0	0	0	0	0	0	Scipione et al., 1996; Zakhama-Sraieb et al., 2006; Zakhama-Sraieb et al., 2011
Caprella rapax Mayer, 1890	0	0	0	0	0	0	0	0	0	0	0	0	0	0	0	0	0	1	0	0	0	0	0	0	0	0	0	0	Bedini et al., 2011
Caprella tavolarensis Sturaro & Guerra-García 2012	0	0	0	0	0	0	0	0	0	0	0	0	0	0	0	0	1	0	0	0	0	0	0	0	0	0	0	0	Sturaro et al., 2014
Centraloecetes dellavallei (Stebbing, 1899)	0	0	0	0	0	0	0	0	0	0	0	0	0	0	0	1	0	1	0	0	0	0	0	1	0	0	0	0	Bedini et al., 2011; Bellisario et al., 2016; Camisa et al., 2017; Sturaro et al., 2015
Centraloecetes neapolitanus (Schiecke, 1978)	0	0	0	0	0	0	0	0	0	0	0	0	0	0	0	0	0	0	0	0	0	0	0	1	0	0	0	0	Camisa et al., 2017
Ceradocus (Ceradocus) orchestiipes Costa, 1853	0	0	0	0	0	0	0	0	0	1	0	1	0	0	0	0	0	1	0	0	0	0	0	0	0	0	0	0	Bedini et al., 2011; Diviacco et al., 1988
Cheirocratus sundevallii (Rathke, 1843)	0	0	0	0	0	0	0	0	0	0	0	0	0	0	0	0	0	0	0	0	0	0	1	0	0	0	0	0	Camisa et al., 2017
Coboldus nitior Krapp-Schickel, 1974	0	0	0	0	0	0	0	0	0	0	0	0	0	0	0	0	0	0	0	0	0	0	0	1	0	0	0	0	Bellisario et al., 2016
Cressa cristata Myers, 1969	0	0	0	0	0	0	0	0	0	0	0	0	0	0	0	0	0	0	0	0	0	0	1	1	0	0	0	0	Bellisario et al., 2016; Camisa et al., 2017
Cressa mediterranea Ruffo, 1979	0	0	0	0	0	0	0	0	0	0	0	0	0	0	0	0	0	0	0	0	0	0	1	1	0	0	0	0	Bellisario et al., 2016; Camisa et al., 2017
Cymadusa crassicornis (Costa, 1853)	0	0	0	0	0	0	0	0	0	0	0	0	0	0	1	1	1	0	1	1	0	0	0	0	1	1	0	1	Sánchez-Jerez et al., 2001; Scipione 1998; Scipione et al., 1996; Sturaro et al., 2015
Deflexilodes gibbosus (Chevreux, 1888)	0	0	0	0	0	0	0	0	0	0	0	0	0	0	0	0	0	0	0	0	0	1	0	0	0	0	0	0	Bellisario et al., 2016
Deflexilodes subnudus (Norman, 1889)	0	0	0	0	0	0	0	0	0	0	0	0	0	0	0	0	0	0	0	0	0	1	1	1	0	0	0	0	Bellisario et al., 2016; Camisa et al., 2017
Deutella shieckei Cavedini, 1982	1	1	1	0	0	0	0	0	0	0	0	0	0	0	0	0	0	0	0	0	0	0	0	0	0	0	0	0	Zakhama-Sraieb et al., 2011
Dexamine spiniventris (Costa, 1853)	0	0	0	0	0	1	1	1	1	0	1	0	0	0	0	1	1	1	1	1	0	0	0	1	0	0	0	1	Bedini et al., 2011; Camisa et al., 2017; Diviacco et al., 1988; Sánchez-Jerez et al., 2001; Scipione 1998; Sturaro et al., 2014; Sturaro et al., 2015; Zakhama-Sraieb et al., 2006; Zakhama-Sraieb et al., 2011
Dexamine spinosa (Montagu, 1813)	1	1	1	1	0	0	1	1	1	1	1	1	0	1	1	1	1	1	1	1	1	1	1	1	1	1	0	1	Bedini et al., 2011; Bellisario et al., 2016; Camisa et al., 2017; Diviacco et al., 1988; Sánchez-Jerez et al., 2001; Scipione 1998; Scipione et al., 1996; Sturaro et al., 2014; Sturaro et al., 2015; Zakhama-Sraieb et al., 2006; Zakhama-Sraieb et al., 201
Elasmopus brasiliensis (Dana, 1855)	1	1	1	0	1	0	0	1	1	0	0	0	0	0	0	0	0	0	0	0	0	0	0	0	0	0	0	0	Zakhama-Sraieb et al., 2006; Zakhama-Sraieb et al., 2011
Elasmopus pectenicrus (Spence Bate, 1862)	0	0	0	0	1	0	0	0	0	0	0	0	0	0	0	0	0	0	0	0	0	0	0	0	0	0	0	0	Zakhama-Sraieb et al., 2011
Elasmopus pocillimanus (Spence Bate, 1862)	0	0	0	0	0	1	1	1	1	0	0	0	0	0	0	0	0	0	0	0	0	0	0	0	0	0	0	0	Zakhama-Sraieb et al., 2006; Zakhama-Sraieb et al., 2011
Elasmopus rapax Costa, 1853	0	0	0	0	0	0	0	0	0	0	0	0	0	0	0	0	0	0	0	0	0	0	0	0	0	0	0	1	Sánchez-Jerez et al., 2001
Ericthonius brasiliensis (Dana, 1853)	0	0	0	0	0	0	0	0	0	0	0	0	1	1	0	0	0	1	0	0	0	0	0	0	0	0	0	0	Bedini et al., 2011; Diviacco et al., 1988
Ericthonius difformis H. Milne Edwards, 1830	0	0	1	0	0	1	0	0	1	0	0	0	0	0	0	0	0	0	0	0	0	0	0	0	0	0	0	0	Zakhama-Sraieb et al., 2011
Ericthonius punctatus (Spence Bate, 1857)	1	1	1	1	1	1	1	1	1	1	0	0	0	0	0	1	1	0	1	1	1	1	1	1	0	0	1	0	Bellisario et al., 2016; Camisa et al., 2017; Scipione, 1998; Zakhama-Sraieb et al., 2006; Zakhama-Sraieb et al., 2011
Eusiroides dellavallei Chevreux, 1899	0	0	0	0	0	0	0	1	0	0	0	0	0	0	0	1	1	1	0	0	0	0	0	0	0	0	0	1	Bedini et al., 2011; Sánchez-Jerez et al., 2001; Sturaro et al., 2014; Sturaro et al., 2015
Gammarella fucicola (Leach, 1814)	0	0	0	0	0	0	0	1	0	1	1	0	0	0	0	1	1	1	1	0	0	0	0	1	0	0	1	1	Bedini et al., 2011; Bellisario et al., 2016; Camisa et al., 2017; Diviacco et al., 1988; Sánchez-Jerez et al., 2001; Scipione et al., 1996; Sturaro et al., 2014; Sturaro et al., 2015; Zakhama-Sraieb et al., 2011
Gammarellus angulosus (Rathke, 1843)	0	0	0	0	0	0	0	0	0	0	0	0	0	0	0	0	0	1	0	0	0	0	0	0	0	0	0	0	Bedini et al., 2011
Gammaropsis crenulata Krapp-Schickel & Myers, 1979	0	0	0	0	0	0	0	0	0	0	0	0	0	0	0	0	0	1	0	0	0	0	0	0	0	0	0	0	Bedini et al., 2011
Gammaropsis dentata Chevreux, 1900	1	1	1	0	0	0	0	0	0	0	0	0	0	0	0	0	1	0	0	0	0	0	0	0	0	0	0	0	Sturaro et al., 2014; Zakhama-Sraieb et al., 2011
Gammaropsis maculata (Johnston, 1828)	0	0	0	0	0	0	0	0	0	0	0	0	0	0	0	0	0	0	0	0	0	1	1	1	0	0	0	0	Bellisario et al., 2016
Gammaropsis ostroumowi Sowinski, 1898	0	0	0	0	0	0	1	0	0	0	0	0	0	0	0	0	0	0	0	0	0	0	0	0	0	0	0	0	Zakhama-Sraieb et al., 2006; Zakhama-Sraieb et al., 2011
Gammaropsis palmata (Stebbing & Robertson, 1891)	0	0	0	0	0	0	0	0	0	1	0	0	0	0	0	0	1	0	1	1	1	1	1	1	1	0	0	0	Bellisario et al., 2016; Scipione et al., 1996; Scipione, 1998; Sturaro et al., 2014
Gammaropsis ulrici Krapp-Schickel & Myers, 1979	0	0	0	0	0	0	0	0	0	0	0	0	0	0	0	0	0	1	0	0	0	0	0	0	0	0	0	0	Bedini et al., 2011
Gammarus aequicauda (Martynov, 1931)	0	0	0	0	0	0	0	0	0	0	0	0	0	0	0	0	1	1	0	0	0	0	0	0	0	0	0	0	Bedini et al., 2011; Sturaro et al., 2014
Gammarus crinicornis Stock, 1966	0	0	0	0	0	0	0	0	0	0	0	0	0	0	0	0	0	1	0	0	0	0	0	0	0	0	0	0	Bedini et al., 2011
Gitana sarsi Boeck, 1871	0	0	0	0	0	0	0	0	0	0	0	0	0	0	0	0	1	0	1	0	1	1	1	1	0	0	0	0	Bellisario et al., 2016; Camisa et al., 2017; Scipione et al., 1996; Scipione, 1998; Sturaro et al., 2014
Guernea (Guernea) coalita (Norman, 1868)	0	0	0	0	0	0	0	0	0	0	0	0	0	0	0	1	1	0	1	0	0	0	0	1	1	0	0	0	Camisa et al., 2017; Scipione et al., 1996; Scipione 1999; Sturaro et al., 2014; Sturaro et al., 2015
Harpinia crenulata (Boeck, 1871)	0	0	0	0	0	0	0	0	0	0	0	0	0	0	0	0	0	0	0	0	0	1	1	0	0	0	0	0	Bellisario et al., 2016
Harpinia zavodniki Karaman, 1987	0	0	0	0	0	0	0	0	0	0	0	0	0	0	0	0	1	0	0	0	0	0	0	0	0	0	0	0	Sturaro et al., 2014
Hyale camptonyx (Heller, 1866)	1	1	1	1	1	1	1	1	1	0	0	0	0	0	0	1	1	0	1	1	0	0	0	0	0	0	0	0	Scipione et al., 1996; Scipione 1999; Sturaro et al., 2014; Sturaro et al., 2015
Hyale crassipes (Heller, 1866)	0	0	0	0	0	0	0	0	0	0	0	0	0	0	0	0	0	1	0	0	0	0	0	0	0	0	0	0	Bedini et al., 2011
Hyale schmidti (Heller, 1866)	0	0	0	0	0	0	0	0	0	1	0	0	0	0	0	0	0	1	1	0	0	0	0	0	1	1	1	0	Bedini et al., 2011; Scipione et al., 1996; Scipione 1999
Hyale stebbingi Chevreux, 1888	0	0	0	0	0	0	0	0	0	0	0	0	0	0	0	0	0	0	0	0	0	0	0	0	0	0	0	1	Sánchez-Jerez et al., 2001
Iphimedia minuta G. O. Sars, 1883	0	0	0	0	0	0	0	0	0	0	1	0	0	0	0	1	1	0	1	0	1	1	1	1	1	1	1	1	Bellisario et al., 2016; Camisa et al., 2017; Diviacco et al., 1988; Sánchez-Jerez et al., 2001; Scipione 1999; Sturaro et al., 2014; Sturaro et al., 2015
Iphimedia serratipes Ruffo & Schiecke, 1979	0	0	0	0	0	0	0	0	0	0	0	0	0	0	0	0	0	1	0	0	0	1	0	0	0	0	0	0	Bedini et al., 2011; Bellisario et al., 2016
Iphimedia vicina Ruffo & Schiecke, 1979	0	0	0	0	0	0	0	0	0	0	0	0	0	0	0	0	0	0	0	0	0	0	0	1	0	0	0	0	Camisa et al., 2017
Ischyrocerus inexpectatus Ruffo, 1959	1	1	0	0	0	0	0	0	1	0	0	0	0	0	0	0	1	0	1	0	1	0	0	0	0	0	1	0	Scipione 1999; Sturaro et al., 2014; Zakhama-Sraieb et al., 2011
Jassa ocia (Spence Bate, 1862)	0	0	0	0	0	0	0	0	0	0	0	0	0	0	0	1	0	1	0	0	0	0	0	0	0	0	0	0	Bedini et al., 2011; Sturaro et al., 2015
Kroyera carinata Spence Bate, 1857	0	0	0	0	0	0	0	0	0	0	0	0	0	0	0	0	0	0	0	0	0	0	0	1	0	0	0	1	Bellisario et al., 2016; Sánchez-Jerez et al., 2001
Lembos websteri Spence Bate, 1857	1	0	1	0	0	1	0	0	0	0	0	0	0	0	0	0	1	0	1	0	1	0	0	0	1	0	0	0	Scipione et al., 1996; Scipione, 1998; Sturaro et al., 2014
Lepidepecreum longicornis (Spence Bate 1862)	0	0	0	0	0	1	0	0	0	0	0	0	0	0	0	0	0	0	0	0	0	0	0	0	0	0	0	1	Sánchez-Jerez et al., 2001; Zakhama-Sraieb et al., 2011
Leptocheirus bispinosus Norman, 1908	0	0	0	0	0	0	0	0	0	0	0	0	0	0	0	0	0	1	0	0	0	0	0	0	0	0	0	0	Bedini et al., 2011
Leptocheirus guttatus (Grube, 1864)	0	0	0	0	0	1	1	1	1	0	0	0	0	0	0	1	1	1	0	0	1	1	1	1	1	0	0	1	Bellisario et al., 2016; Camisa et al., 2017; Sánchez-Jerez et al., 2001; Scipione 1999; Sturaro et al., 2014; Sturaro et al., 2015; Zakhama-Sraieb et al., 2006; Zakhama-Sraieb et al., 2011
Leptocheirus pectinatus (Norman, 1869)	0	0	0	0	0	0	0	0	0	1	0	0	0	0	0	0	1	0	0	0	0	0	0	0	0	0	0	0	Scipione 1999; Sturaro et al., 2014
Leptocheirus pilosus Zaddach, 1844	0	0	0	0	0	0	0	0	0	0	0	0	0	0	0	0	0	0	0	0	0	1	0	1	0	0	0	0	Bellisario et al., 2016; Camisa et al., 2017
Leucothoe euryonyx (Walker, 1901)	0	0	0	0	0	0	0	0	0	0	0	0	0	0	0	0	0	1	0	0	0	1	0	0	0	0	0	0	Bedini et al., 2011; Bellisario et al., 2016
Leucothoe procera Spence Bate, 1857	0	0	0	0	0	0	0	0	0	0	0	0	0	0	0	0	0	1	0	0	0	0	0	0	0	0	0	0	Bedini et al., 2011
Leucothoe richiardii Lesson, 1865	0	0	0	0	0	0	0	0	0	0	0	0	0	1	0	0	0	0	0	0	0	0	0	0	0	0	0	0	Diviacco et al., 1988
Leucothoe spinicarpa (Abildgaard, 1789)	0	0	0	0	0	1	1	1	0	0	0	0	1	0	0	1	1	1	0	0	1	1	1	1	1	0	1	1	Bedini et al., 2011; Bellisario et al., 2016; Camisa et al., 2017; Diviacco et al., 1988; Sánchez-Jerez et al., 2001; Scipione et al., 1996; Scipione 1999; Sturaro et al., 2014; Sturaro et al., 2015; Zakhama-Sraieb et al., 2006; Zakhama-Sraieb et al., 201
Leucothoe venetiarum Giordani-Soika, 1950	0	0	0	0	0	0	0	0	1	0	0	0	0	0	0	0	0	0	0	0	0	0	0	0	0	0	0	0	Zakhama-Sraieb et al., 2006; Zakhama-Sraieb et al., 2011
Liljeborgia dellavallei Stebbing, 1906	0	0	0	0	0	0	0	0	0	0	1	1	0	0	0	1	1	1	1	0	1	1	1	1	1	1	0	0	Bedini et al., 2011; Bellisario et al., 2016; Camisa et al., 2017; Diviacco et al., 1988; Scipione et al., 1996; Scipione 1999; Sturaro et al., 2014; Sturaro et al., 2015
Lysianassa costae (H. Milne Edwards, 1830)	1	1	0	1	1	1	1	1	1	1	1	0	0	0	0	0	1	1	0	0	0	1	0	1	0	0	0	0	Bedini et al., 2011; Bellisario et al., 2016; Camisa et al., 2017; Diviacco et al., 1988; Sturaro et al., 2014; Zakhama-Sraieb et al., 2006; Zakhama-Sraieb et al., 2011
Lysianassa pilicornis (Heller, 1866)	0	0	0	0	0	0	0	0	0	0	1	1	0	0	0	1	1	1	0	0	0	0	0	0	0	0	0	0	Bedini et al., 2011; Diviacco et al., 1988; Sturaro et al., 2014; Sturaro et al., 2015
Lysianassa plumosa Boeck, 1871	0	0	0	0	0	0	0	0	0	0	1	0	0	0	0	0	0	0	0	0	0	0	0	0	0	0	0	0	Diviacco et al., 1988
Lysianassina longicornis (Lucas, 1846)	0	0	0	0	0	0	0	0	0	0	0	0	0	0	0	1	1	1	0	0	0	0	1	0	0	0	0	1	Bedini et al., 2011; Sánchez-Jerez et al., 2001; Sturaro et al., 2014; Sturaro et al., 2015
Lysianella dellavallei Stebbing, 1906	0	0	0	0	0	0	0	0	0	0	0	0	0	0	0	0	0	1	0	0	0	0	0	0	0	0	0	0	Bedini et al., 2011
Maera grossimana (Montagu, 1808)	0	0	0	0	0	0	0	0	0	1	0	1	0	0	0	1	0	0	0	0	0	0	0	0	0	0	0	1	Diviacco et al., 2011; Sánchez-Jerez et al., 2001; Scipione 1999; Sturaro et al., 2015
Maera hirondellei Chevreux, 1900	0	0	1	1	1	1	1	1	1	0	0	0	0	0	0	0	0	0	0	0	0	0	0	0	0	0	0	0	Zakhama-Sraieb et al., 2006; Zakhama-Sraieb et al., 2011
Maera pachytelson Karaman & Ruffo, 1971	0	0	0	0	0	0	0	0	0	1	1	0	0	0	0	0	0	0	0	0	0	0	0	0	0	0	0	0	Diviacco et al., 2011
Maerella tenuimana (Spence Bate, 1862)	0	0	0	0	0	0	0	0	0	0	0	0	0	0	0	0	0	1	0	0	0	0	0	0	0	0	0	0	Bedini et al., 2011
Marinohyalella richardi (Chevreux, 1902)	0	0	0	0	0	0	0	0	0	0	0	0	0	0	0	0	0	1	0	0	0	0	0	0	0	0	0	0	Bedini et al., 2011
Metaphoxus fultoni (Scott, 1890)	0	0	0	0	0	0	0	0	0	0	0	0	0	0	0	0	0	0	0	0	1	1	1	0	0	0	0	0	Bellisario et al., 2016; Scipione 1999
Metaphoxus simplex (Spence Bate, 1857)	0	0	0	0	0	1	0	1	1	0	0	0	0	0	0	0	0	0	0	0	0	0	0	0	0	0	0	0	Zakhama-Sraieb et al., 2006; Zakhama-Sraieb et al., 2011
Microdeutopus algicola Della Valle, 1893	0	0	0	0	0	0	0	0	0	0	0	0	0	0	0	0	0	1	0	0	0	0	0	0	0	0	0	0	Bedini et al., 2011
Microdeutopus anomalus (Rathke, 1843)	0	0	0	0	0	0	0	0	0	0	0	0	0	0	0	0	1	0	0	0	1	0	0	0	0	0	0	0	Scipione 1999; Sturaro et al., 2014
Microdeutopus chelifer (Spence Bate, 1862)	0	1	1	0	0	0	0	1	0	0	0	0	0	0	0	0	0	1	0	0	0	0	0	0	0	0	0	0	Bedini et al., 2011; Zakhama-Sraieb et al., 2011
Microdeutopus obtusatus Myers, 1973	0	0	0	0	0	0	0	0	0	0	0	0	0	0	0	0	0	1	1	0	0	0	0	0	0	0	0	0	Bedini et al., 2011; Scipione 1999
Microdeutopus similis Myers, 1977	0	0	0	0	0	0	0	0	0	0	0	0	0	0	0	0	1	0	0	0	0	0	0	0	0	0	0	0	Sturaro et al., 2014
Microdeutopus stationis Della Valle, 1893	0	0	0	0	0	0	0	0	0	0	0	0	1	0	0	0	0	0	0	0	0	0	0	0	0	0	0	0	Diviacco et al., 1988
Microdeutopus versiculatus (Spence Bate 1857)	0	0	0	0	0	0	0	0	0	0	0	0	0	0	0	0	0	1	0	0	0	0	0	0	0	0	0	0	Bedini et al., 2011
Microjassa cumbrensis (Stebbing & Robertson, 1891)	0	0	0	0	0	0	0	0	0	0	0	0	0	0	0	0	0	0	0	0	0	1	1	1	0	0	0	0	Bellisario et al., 2016; Camisa et al., 2017
Micropythia carinata (Spence Bate, 1862)	0	0	0	0	0	0	0	0	0	1	0	0	0	0	0	0	0	0	0	0	0	0	0	1	0	0	0	0	Camisa et al., 2017; Scipione 1999
Nannonyx propinquus Chevreux, 1911	0	0	0	0	0	0	0	0	0	0	0	0	0	0	0	0	1	0	0	0	0	0	0	0	0	0	0	0	Sturaro et al., 2014
Nototropis guttatus Costa, 1853	0	0	0	0	0	0	0	0	0	0	0	0	0	0	0	1	1	0	0	1	0	0	0	1	0	0	0	1	Camisa et al., 2017; Sánchez-Jerez et al., 2001; Scipione 1999; Sturaro et al., 2014; Sturaro et al., 2015
Nototropis massiliensis (Bellan-Santini, 1975)	0	0	0	0	0	0	0	0	0	0	0	0	0	0	0	0	0	0	0	0	0	1	0	1	0	0	0	0	Bellisario et al., 2016
Nototropis vedlomensis (Spence Bate & Westwood, 1862)	0	0	0	0	0	0	0	0	0	0	1	0	0	0	0	0	1	0	0	0	0	0	0	1	0	0	0	1	Camisa et al., 2017; Diviacco et al., 1988; Sánchez-Jerez et al., 2001; Sturaro et al., 2014
Orchestia montagui Audouin, 1826	0	0	0	0	0	0	0	0	0	0	0	0	0	0	0	0	0	1	0	0	0	0	0	0	0	0	0	0	Bedini et al., 2011
Orchomene humilis (Costa, 1853)	0	0	0	0	0	1	1	1	0	1	1	1	0	0	0	1	1	0	1	1	0	1	1	1	0	0	0	1	Bellisario et al., 2016; Camisa et al., 2017; Diviacco et al., 1988; Sánchez-Jerez et al., 2001; Scipione et al., 1996; Scipione 1999; Sturaro et al., 2014; Zakhama-Sraieb et al., 2006; Zakhama-Sraieb et al., 2011
Orchomene massiliensis Ledoyer, 1977	0	0	0	0	0	0	0	0	0	0	0	0	0	0	0	0	0	0	0	0	0	0	0	1	0	0	0	0	Camisa et al., 2017
Orchomene similis Chevreux, 1912	0	0	0	0	0	0	0	0	0	0	0	0	0	0	0	1	0	0	0	0	0	1	1	1	0	0	0	0	Bellisario et al., 2016; Camisa et al., 2017; Sturaro et al., 2015
Othomaera knudseni (Reid, 1951)	0	0	0	0	0	0	0	0	0	0	0	0	0	0	0	0	0	1	0	0	0	0	0	0	0	0	0	1	Bedini et al., 2011; Sánchez-Jerez et al., 2001
Parhyale aquilina (Costa, 1857)	0	0	0	0	0	1	0	1	0	0	0	0	0	0	0	0	0	0	0	0	0	0	0	0	0	0	0	0	Zakhama-Sraieb et al., 2006; Zakhama-Sraieb et al., 2011
Pariambus typicus (Krøyer, 1884)	0	0	0	0	0	0	0	0	0	0	0	0	0	0	0	0	0	0	0	0	0	1	0	0	0	0	0	0	Bellisario et al., 2016
Peltocoxa gibbosa (Schiecke, 1977)	0	0	0	0	0	0	0	0	0	0	0	0	0	0	0	0	1	0	1	0	0	0	0	1	0	0	0	0	Bellisario et al., 2016; Camisa et al., 2017; Scipione et al., 1996; Sturaro et al., 2014
Peltocoxa marioni Catta, 1875	1	0	0	0	0	1	1	1	0	1	0	0	0	0	1	1	1	0	1	0	1	0	0	0	1	0	0	0	Scipione et al., 1996; Scipione 1999; Sturaro et al., 2014; Sturaro et al., 2015; Zakhama-Sraieb et al., 2006
Peltocoxa mediterranea Schiecke, 1977	0	0	0	0	0	0	0	0	0	0	0	0	0	0	0	0	0	1	0	0	0	1	1	1	0	0	0	0	Bedini et al., 2011; Bellisario et al., 2016; Camisa et al., 2017
Pereionotus testudo (Montagu, 1808)	1	0	1	0	0	0	0	1	0	0	0	0	0	0	0	0	0	0	0	1	0	0	1	1	0	0	0	1	Bellisario et al., 2016; Camisa et al., 2017; Sánchez-Jerez et al., 2001; Scipione 1999; Zakhama-Sraieb et al., 2011
Perioculodes aequimanus (Korssman, 1880)	0	0	0	0	0	0	0	0	0	0	0	0	0	0	0	0	1	0	0	0	1	1	1	1	0	0	0	0	Bellisario et al., 2016; Camisa et al., 2017; Scipione 1999; Sturaro et al., 2014
Perioculodes longimanus (Spence Bate & Westwood, 1868)	0	0	0	0	0	0	0	0	0	0	0	0	0	0	0	0	0	0	0	0	0	1	0	0	0	0	0	0	Bellisario et al., 2016
Photis longicaudata (Spence Bate & Westwood, 1862)	0	0	0	0	0	0	0	0	0	0	0	0	0	0	0	0	0	1	1	1	0	0	0	0	0	0	0	0	Bedini et al., 2011; Scipione et al., 1996; Scipione 1999
Photis longipes (Della Valle, 1893)	0	0	0	0	0	0	0	0	0	0	0	0	0	0	0	0	0	1	0	0	0	0	0	0	0	0	0	0	Bedini et al., 2011
Phoxocephalus aquosus Karaman, 1985	0	0	0	0	0	0	0	0	0	0	0	0	0	0	0	0	0	0	0	0	0	1	1	0	0	0	0	0	Bellisario et al., 2016
Phtisica marina Slabber, 1769	0	0	0	0	0	0	0	0	0	0	0	0	0	0	1	1	1	1	1	1	1	1	1	1	1	1	1	1	Bedini et al., 2011; Bellisario et al., 2016; Camisa et al., 2017; Sánchez-Jerez et al., 2001; Scipione et al., 1996; Scipione 1999; Sturaro et al., 2014; Sturaro et al., 2015
Pleonexes helleri (Karaman, 1975)	1	1	1	1	1	1	1	1	1	0	0	0	0	0	1	1	1	1	1	1	1	0	0	0	1	1	0	0	Bedini et al., 2011; Scipione et al., 1996; Scipione 1999; Sturaro et al., 2014; Zakhama-Sraieb et al., 2006
Podocerus variegatus Leach, 1814	0	0	0	0	0	0	0	0	0	0	0	0	0	0	0	0	1	1	0	0	0	0	0	0	0	0	0	0	Bedini et al., 2011; Sturaro et al., 2014
Pontocrates arenarius (Spence Bate, 1858)	0	0	0	0	0	0	0	0	0	0	0	0	0	0	0	0	0	0	0	0	0	0	0	1	0	0	0	0	Camisa et al., 2017
Pseudolirius kroyeri (Haller, 1897)	0	0	0	0	0	0	0	0	0	0	0	0	0	0	0	0	1	0	0	0	0	0	0	0	0	0	0	0	Sturaro et al., 2014
Pseudoprotella phasma (Montagu, 1804)	0	0	0	0	0	1	1	0	1	0	0	0	0	0	1	1	1	1	1	1	1	0	1	1	0	1	0	0	Bedini et al., 2011; Bellisario et al., 2016; Scipione 1999; Sturaro et al., 2014; Sturaro et al., 2015; Zakhama-Sraieb et al., 2006; Zakhama-Sraieb et al., 2011
Quadrimaera inaequipes (A. Costa in Hope, 1851)	1	1	1	1	1	1	1	1	1	0	0	0	1	1	0	0	0	1	0	0	1	0	0	0	0	0	0	0	Bedini et al., 2011; Diviacco et al., 1988; Scipione 1999; Zakhama-Sraieb et al., 2006; Zakhama-Sraieb et al., 2011
Socarnes filicornis (Heller, 1866)	0	0	0	0	0	0	0	0	1	0	0	0	0	0	0	0	0	0	0	0	0	0	0	1	0	0	0	0	Camisa et al., 2017; Zakhama-Sraieb et al., 2006; Zakhama-Sraieb et al., 2011
Stenothoe dollfusi Chevreux, 1887	0	0	0	0	0	0	0	0	0	0	0	0	0	0	0	0	0	0	0	0	0	0	0	1	0	0	0	0	Camisa et al., 2017
Stenothoe eduardi Krapp- Schickel, 1975	0	0	0	0	0	0	0	0	0	0	0	0	0	0	0	0	1	0	0	0	0	0	0	0	0	0	0	0	Sturaro et al., 2014
Stenothoe gallensis Walker, 1904	0	1	0	0	1	0	0	0	0	0	0	0	0	0	0	0	0	0	0	0	0	0	0	0	0	0	0	0	Zakhama-Sraieb et al., 2011
Stenothoe monoculoides (Montagu, 1813)	0	1	1	1	1	1	0	1	1	0	0	0	0	0	0	1	0	0	1	0	1	0	1	1	1	1	0	0	Bellisario et al., 2016; Scipione et al., 1996; Scipione 1999; Sturaro et al., 2015; Zakhama-Sraieb et al., 2011
Stenothoe tergestina (Nebeski, 1881)	0	0	0	0	0	0	0	0	0	0	0	0	0	0	0	0	0	1	0	0	0	0	0	0	0	0	0	0	Bedini et al., 2011
Synchelidium longidigitatum Ruffo,1947	0	0	0	0	0	0	0	0	0	0	0	0	0	0	0	1	1	0	1	0	1	1	1	1	0	0	0	0	Bellisario et al., 2016; Camisa et al., 2017; Scipione et al., 1996; Scipione 1999; Sturaro et al., 2014; Sturaro et al., 2015
Tethylembos viguieri (Chevreux, 1911)	0	0	0	0	0	0	0	0	1	0	0	0	0	0	0	0	0	0	0	0	0	0	0	0	0	0	0	0	Zakhama-Sraieb et al., 2006
Tmetonyx nardonis (Heller, 1867)	0	0	0	0	0	0	0	0	0	0	0	0	0	0	0	1	1	0	1	0	0	0	0	1	0	0	0	0	Camisa et al., 2017; Scipione et al., 1996; Sturaro et al., 2014; Sturaro et al., 2015
Tmetonyx similis (G.O. Sars, 1891)	0	0	0	0	0	0	0	0	0	0	0	0	0	0	0	0	0	1	0	0	0	0	0	0	0	0	0	0	Bedini et al., 2011
Tritaeta gibbosa (Spence Bate, 1862)	1	1	1	1	0	1	1	1	1	0	0	0	0	0	0	1	1	1	0	0	0	0	0	0	0	0	0	0	Bedini et al., 2011; Sturaro et al., 2014; Sturaro et al., 2015; Zakhama-Sraieb et al., 2006; Zakhama-Sraieb et al., 2011
Tryphosa nana (Krøyer, 1846)	0	0	0	0	0	0	0	0	0	0	0	0	0	0	0	0	0	0	0	0	0	0	0	1	0	0	0	0	Camisa et al., 2017
Unciolella lunata Chevreux, 1911	0	0	0	0	0	0	0	0	0	0	0	0	0	0	0	0	0	1	0	0	0	0	0	0	0	0	0	0	Bedini et al., 2011
Urothoe poseidonis Reibish, 1905	0	0	0	0	0	0	0	0	0	0	0	0	0	0	0	0	0	1	0	0	0	0	0	0	0	0	0	0	Bedini et al., 2011
